# Supplementary material
Source: publisher figshare collection journal article supplement (https://gsajournals.figshare.com/ndownloader/files/23187077)
Supplement: Supplementary file 1 [file 23187077]

|  | **SRA Accession** | **Reported Genome**  **Sizea** | **Read Mapping** | **CovEST Basic** | **CovEST Repeat** | **Genome Scope** |
| --- | --- | --- | --- | --- | --- | --- |
| *A. thaliana* | ERR3624573 | 157.00 | 149.25 | 115.58 | 130.81 | 118.44 |
| *A. thaliana* | ERR3624574 | 157.00 | 183.37 | 129.34 | 235.76 | 126.60 |
| *A. thaliana* | ERR3624575 | 157.00 | 162.05 | 117.68 | 133.10 | 123.01 |
| *A .thaliana* | SRR10178322 | 157.00 | 218.29 | 134.50 | 156.02 | 125.08 |
| *C. elegans* | SRR7872876 | 100.00 | 102.50 | 94.72 | 110.23 | 98.86 |
| *C. elegans* | SRR7872877 | 100.00 | 103.27 | 94.05 | 106.49 | 97.63 |
| *C. elegans* | SRR8443481 | 100.00 | 115.78 | 97.25 | 106.74 | 101.99 |
| *C. elegans* | SRR9322237 | 100.00 | 113.22 | 72.06 | 105.59 | 99.15 |
| *D. melanogaster* | SRR10512945 | 175.00 | 114.81 | 132.94 | 214.45 | 138.58 |
| *D. melanogaster* | SRR1515985 | 175.00 | 202.23 | 132.99 | 182.29 | 151.63 |
| *D. melanogaster* | SRR2968981 | 175.00 | 132.91 | 138.70 | 206.03 | 133.58 |
| *D. melanogaster* | SRR6366285 | 175.00 | 183.30 | 138.68 | 162.26 | 150.65 |

Table S14. Genome size estimates of model species (*Arabidopsis thaliana*, *Caenorhabditis elegans*, and *Drosophila melanogaster*) using sequence-based methods. Values given in Mb. CovEST Basic, CovEST Repeat, and GenomeScope analyses were conducted using a k value of 21.

a. Reported genome size from Bennett et al., 2013.
